# Supplementary material for: Health Service Seeking Behavior among Migrant Workers in Small and Medium-Sized Enterprises in Guangdong, China: Does Family Migration Matter?
Source: Hindawi journal article supplement (doi:10.1155/2018/3620436), 2018-11-21
Supplement: f1 [file 3620436.f1.pdf]

---

Appendix:

**Survey of Occupational Health Status of Migrant Workers in Small and Medium-sized Enterprises in Guangdong Province, China**

**Part I Demographic characteristics**

1. Birthday : year of birth : \_\_\_\_\_ month of birth : \_\_\_\_\_ ;
2. Sex: 1 male 2 female
3. Where is the place of your household registration ('*hukou*')?  
\_\_\_\_\_ county (district) \_\_\_\_\_ city \_\_\_\_\_ province
4. What is the highest level of education you have completed?  
1 primary school or illiteracy 2 Secondary school  
3 High School or equivalent 4 University/College or above
5. Were there family members who lived with you for more than six months in the host city?  
1 No, I'm living alone  
2 Yes and how many: \_\_\_\_\_.
6. Your monthly income from the job : \_\_\_\_\_RMB/ per month

**Part II Migration**

1. Length of stay in the investigated city : \_\_\_ year and \_\_\_ month
2. When you firstly migrated from your home to cities : \_\_\_\_\_ month \_\_\_\_\_ year

**Part III Insurance**

What kind of medical insurance do you have?

- 1 New Rural Cooperative Medical Insurance
- 2 Urban Employee Basic Medical Insurance
- 3 Urban Resident Basic Medical Insurance
- 4 Special insurance for the migrants
- 5 Employment injury insurance

- 6 Employment injury insurance
- 7 Commercial health insurance
- 8 Have one, but don't know which one is
- 9 None of those above

#### **Part IV Health and health service utilization**

1. In general, would you say your health is :

- 1 very good    2 good    3 fair    4 poor    5 very poor

2. Number of the current diseases diagnosed by a physician:

In the following list, mark your diseases or injuries for the past 12 months. Also indicated whether a physician has diagnosed or treated these disease. For each, disease, therefore, there can be 2, 1 or no alternative circled.

|    | Injury from accidents                                                                    | Yes,<br>physician's<br>diagnosis | Yes,<br>own<br>opinion |
|----|------------------------------------------------------------------------------------------|----------------------------------|------------------------|
| 01 | back                                                                                     | 1                                | 2                      |
| 02 | arm/hand                                                                                 | 1                                | 2                      |
| 03 | leg/foot                                                                                 | 1                                | 2                      |
| 04 | other parts of the body                                                                  | 1                                | 2                      |
|    | where and what :                                                                         |                                  |                        |
|    | Musculoskeletal disease                                                                  | Yes,<br>physician's<br>diagnosis | Yes,<br>own<br>opinion |
| 05 | disorder of the upper back or cervical, spine, repeated instances of pain                | 1                                | 2                      |
| 06 | disorder of the lower back, repeated instances of pain                                   | 1                                | 2                      |
| 07 | (sciatica) pain radiating from the back into the leg                                     | 1                                | 2                      |
| 08 | A musculoskeletal disorder affecting the limbs (hands, feet), repeated instances of pain | 1                                | 2                      |

|    |                                                                                                    |                                  |                        |
|----|----------------------------------------------------------------------------------------------------|----------------------------------|------------------------|
| 09 | rheumatoid arthritis                                                                               | 1                                | 2                      |
| 10 | other musculoskeletal disorder                                                                     | 1                                | 2                      |
|    | what :                                                                                             |                                  |                        |
|    | Cardiovascular diseases                                                                            | Yes,<br>physician's<br>diagnosis | Yes,<br>own<br>opinion |
| 11 | hypertension (high blood pressure)                                                                 | 1                                | 2                      |
| 12 | coronary heart disease, chest pains during exercises (angina pectoris)                             | 1                                | 2                      |
| 13 | coronary thrombosis, myocardial infarction                                                         | 1                                | 2                      |
| 14 | cardiac insufficiency                                                                              | 1                                | 2                      |
| 15 | other cardiovascular diseases                                                                      | 1                                | 2                      |
|    | what :                                                                                             |                                  |                        |
|    | Respiratory disease                                                                                | Yes,<br>physician's<br>diagnosis | Yes,<br>own<br>opinion |
| 16 | repeated infections of the respiratory tract (also tonsillitis, acute sinusitis, acute bronchitis) | 1                                | 2                      |
| 17 | chronic bronchitis                                                                                 | 1                                | 2                      |
| 18 | chronic sinusitis                                                                                  | 1                                | 2                      |
| 19 | bronchial asthma                                                                                   | 1                                | 2                      |
| 20 | emphysema                                                                                          | 1                                | 2                      |
| 21 | pulmonary tuberculosis                                                                             | 1                                | 2                      |
| 22 | other respiratory diseases                                                                         | 1                                | 2                      |
|    | what? :                                                                                            |                                  |                        |
|    | Mental disorder                                                                                    | Yes,<br>physician's<br>diagnosis | Yes,<br>own<br>opinion |
| 23 | mental disease or severe mental health problem (for example,                                       | 1                                | 2                      |

|    |                                                                                                                   |                                  |                        |
|----|-------------------------------------------------------------------------------------------------------------------|----------------------------------|------------------------|
|    | severe depression, mental disturbance)                                                                            |                                  |                        |
| 24 | slight mental disorder or problem (for example, slight depression, tension, anxiety, insomnia)                    | 1                                | 2                      |
|    | Neurological and sensory disease                                                                                  | Yes,<br>physician's<br>diagnosis | Yes,<br>own<br>opinion |
| 29 | problems or injury to hearing (for example epicophosis, tinnitus, acute or chronic otitis media, myringorupture ) | 1                                | 2                      |
| 30 | visual disease or injury (for example glaucoma, cataract, trachoma)                                               | 1                                | 2                      |
| 31 | neurological disease (for example stroke, neuralgia, migraine, epilepsy)                                          | 1                                | 2                      |
| 32 | other neurological or sensory disease                                                                             | 1                                | 2                      |
|    | what :                                                                                                            |                                  |                        |
|    | Digestive disease                                                                                                 | Yes,<br>physician's<br>diagnosis | Yes,<br>own<br>opinion |
| 35 | gallstones or disease                                                                                             | 1                                | 2                      |
| 36 | liver or pancreatic disease                                                                                       | 1                                | 2                      |
| 37 | gastric or duodenal ulcer                                                                                         | 1                                | 2                      |
| 38 | gastritis or duodenal irritation                                                                                  | 1                                | 2                      |
| 39 | colonic irritation, colitis                                                                                       | 1                                | 2                      |
| 40 | other digestive diseases                                                                                          | 1                                | 2                      |
|    | what :                                                                                                            |                                  |                        |
|    | Genitourinary disease                                                                                             | Yes,<br>physician's<br>diagnosis | Yes,<br>own<br>opinion |
| 41 | urinary tract infection                                                                                           | 1                                | 2                      |
| 42 | kidney disease                                                                                                    | 1                                | 2                      |

|    |                                                                                                |                                  |                        |
|----|------------------------------------------------------------------------------------------------|----------------------------------|------------------------|
| 43 | genitals disease (for example fallopian tube infection in women or prostatic infection in men) | 1                                | 2                      |
| 44 | other genitourinary diseases                                                                   | 1                                | 2                      |
|    | what :                                                                                         |                                  |                        |
|    | Skin disease                                                                                   | Yes,<br>physician's<br>diagnosis | Yes,<br>own<br>opinion |
| 45 | allergic rash, eczema                                                                          | 1                                | 2                      |
| 46 | other rashes                                                                                   | 1                                | 2                      |
| 47 | what :                                                                                         | 1                                | 2                      |
| 48 | other skin diseases                                                                            | 1                                | 2                      |
|    | what :                                                                                         |                                  |                        |
|    | Tumor                                                                                          | Yes,<br>physician's<br>diagnosis | Yes,<br>own<br>opinion |
| 49 | benign tumor                                                                                   | 1                                | 2                      |
| 50 | malignant tumor (cancer)                                                                       | 1                                | 2                      |
|    | what and where :                                                                               |                                  |                        |
|    | Endocrine and metabolic diseases                                                               | Yes,<br>physician's<br>diagnosis | Yes,<br>own<br>opinion |
| 51 | obesity                                                                                        | 1                                | 2                      |
| 52 | diabetes                                                                                       | 1                                | 2                      |
| 53 | goiter or others thyroid disease                                                               | 1                                | 2                      |
| 54 | other endocrine or metabolic disease                                                           | 1                                | 2                      |
|    | what :                                                                                         |                                  |                        |
|    | Blood diseases and birth defects                                                               | Yes,<br>physician's              | Yes,<br>own            |

|    |                           | diagnosis | opinion |
|----|---------------------------|-----------|---------|
| 55 | anemia                    | 1         | 2       |
| 56 | other blood disorder      | 1         | 2       |
|    | what :                    |           |         |
| 57 | birth defect              | 1         | 2       |
|    | what :                    |           |         |
| 58 | Other disorder or disease | 1         | 2       |
|    | what :                    |           |         |

3. In the past 12 months, have you seen a doctor from your practice (not included the purchase of medicine in the pharmacy)?

1 No

2 Yes

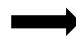

3.1 Have you seen a doctor back to your hometown?

1 No

2 Yes

4. What's the barriers you didn't go to see the doctor when you were ill:

Main barrier \_\_\_\_\_ (only one option);

Secondary barrier \_\_\_\_\_ (only one option)

1 High cost of health services

2 Lacking caregivers in the host city

3 Having no free time

4 Long distance from medical institutions

5 Don't know where to go
